# Supplementary material for: Novel insights into lattice thermal transport in nanocrystalline Mg3Sb2 from first principles: the crucial role of higher-order phonon scattering
Source: Royal Society of Chemistry journal article supplement (doi:10.1039/d2cp01967a), 2022-01-01
Supplement: d2cp01967a1.pdf [file d2cp01967a1.pdf]

## Supplementary materials

# **Novel insights into lattice thermal transport in nanocrystalline Mg<sub>3</sub>Sb<sub>2</sub> from first principles: The crucial role of higher-order phonon scattering**

Zheng Chang<sup>a,‡</sup>, Jiongzhi Zheng<sup>b, ‡</sup>, Yuhang Jing<sup>c</sup>, Weiqi Li<sup>f</sup>, Kunpeng Yuan<sup>a</sup>, Jing Ma<sup>a</sup>, Yufei Gao<sup>a</sup>,  
Xiaoliang Zhang<sup>a,\*</sup>, Ming Hu<sup>c,\*</sup>, Jianqun Yang<sup>d,\*</sup>, Dawei Tang<sup>a,\*</sup>

<sup>a</sup>*Key Laboratory of Ocean Energy Utilization and Energy Conservation of Ministry of Education, School of Energy and Power Engineering, Dalian University of Technology, Dalian 116024, China.*

<sup>b</sup>*Department of Mechanical and Aerospace Engineering, The Hong Kong University of Science and Technology, Clear Water Bay, Kowloon, Hong Kong 999077, China.*

<sup>c</sup>*Department of Mechanical Engineering, University of South Carolina, Columbia, South Carolina 29208, USA.*

<sup>d</sup>*School of Materials Science and Engineering, Harbin Institute of Technology, Harbin 150001, China*

<sup>e</sup>*School of Astronautics, Harbin Institute of Technology, Harbin 150001, China*

<sup>f</sup>*School of Physics, Harbin Institute of Technology, Harbin 150001, China*

*\*Corresponding author. Email: [zhangxiaoliang@dlut.edu.cn](mailto:zhangxiaoliang@dlut.edu.cn), [hu@sc.edu](mailto:hu@sc.edu), [yangjianqun@hit.edu.cn](mailto:yangjianqun@hit.edu.cn) and [dwtang@dlut.edu.cn](mailto:dwtang@dlut.edu.cn)*

<sup>‡</sup>*These authors contributed equally.*

## Convergence test

Regarding the convergence test of  $\kappa$  at 300 K *versus* different **Q**-points mesh along in- and cross-plane directions depicted in Figure S1, we observe that considering only three phonon scattering requires a  $25 \times 25 \times 25$  **Q**-point mesh to produce converged values, while the inclusion of three- and four-phonon scatterings only requires a  $13 \times 13 \times 13$  **Q**-point mesh to converge. Meanwhile, we also perform calculations on the above convergence **Q**-points mesh with scalebroad=1.0. Furthermore, it can be clearly seen that both  $\kappa_{xx}(3+4\text{ph})$  and  $\kappa_{zz}(3+4\text{ph})$  represent two convergence trends that is similar to  $\kappa_{xx}(3\text{ph})$  and  $\kappa_{zz}(3\text{ph})$ , respectively.

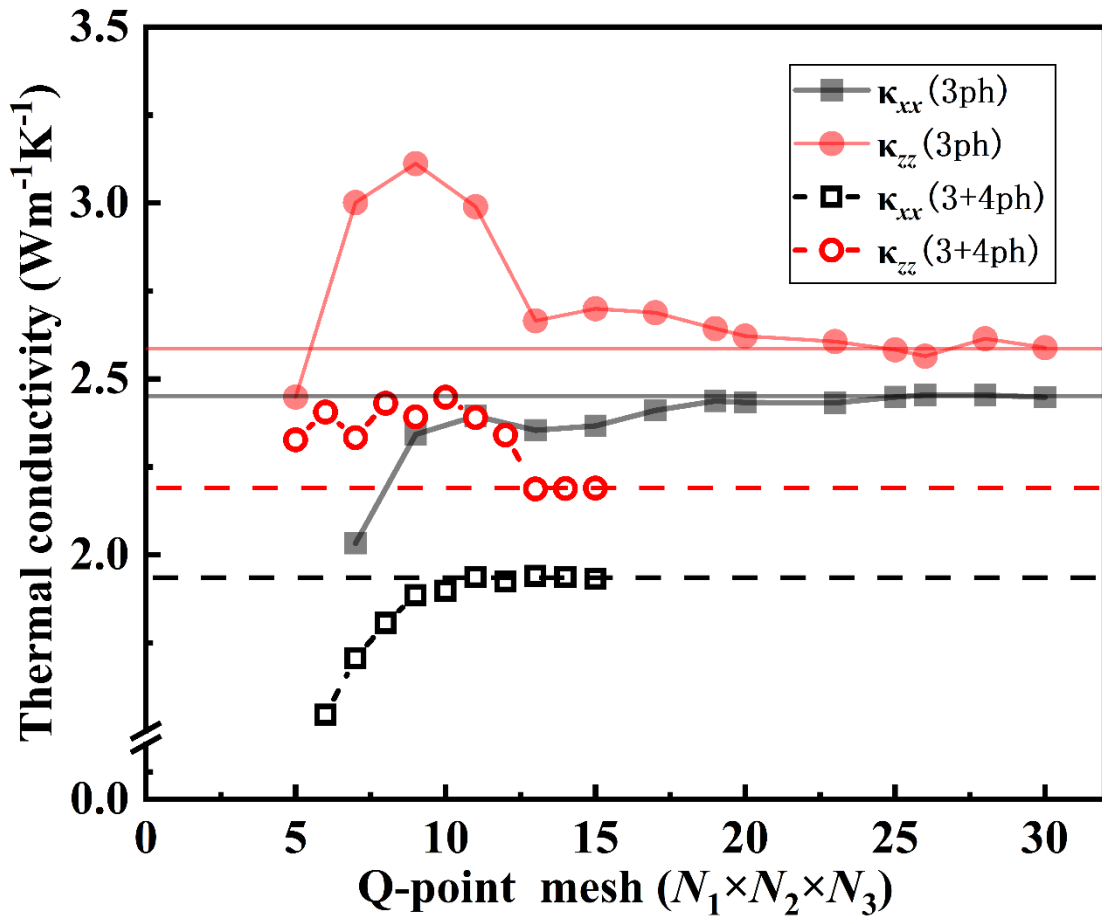

Figure S1. Variation of the computed lattice thermal conductivity ( $\kappa$ ) of  $\text{Mg}_3\text{Sb}_2$  at 300K considering only three-phonon scattering (3ph) and both three- and four-phonon scatterings (3+4ph) along in- and cross-plane directions with respect to different **Q**-points mesh.

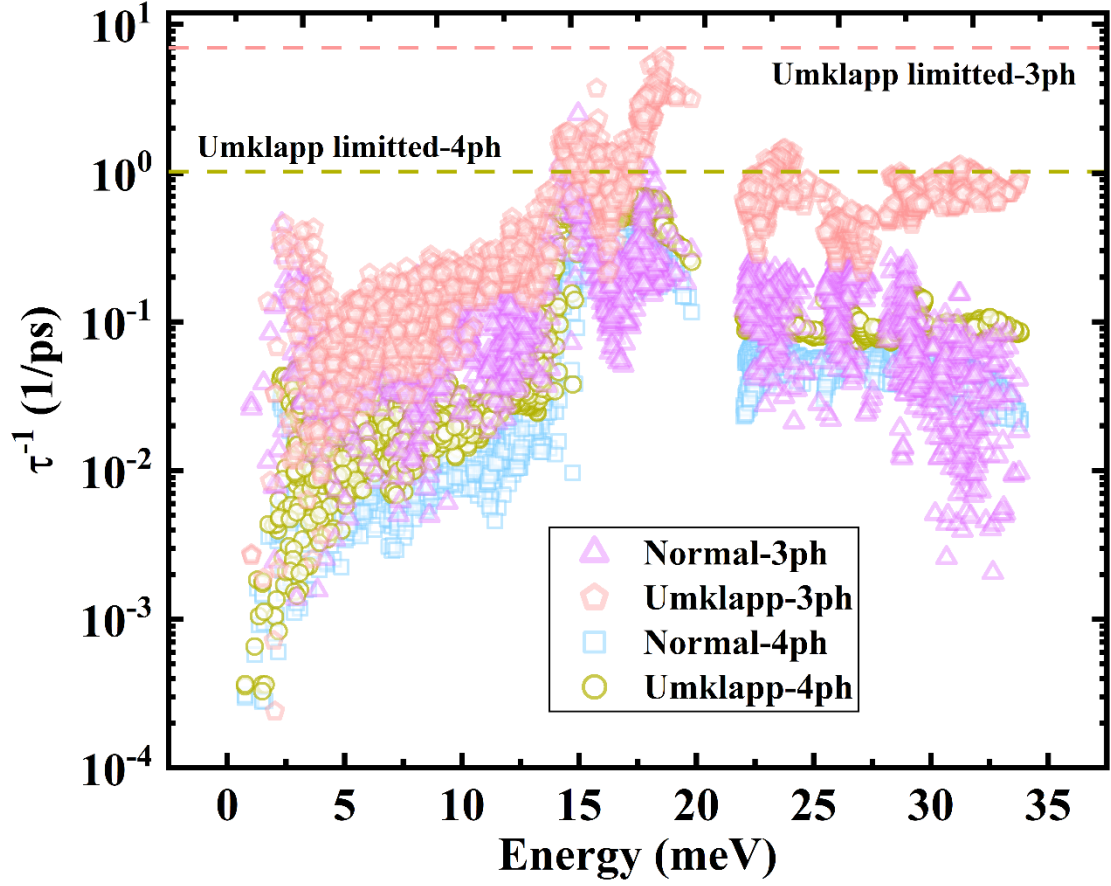

Figure S2. Phonon model level scattering rate decomposed into Normal- and Umklapp-processes in 3ph- and 4ph-scattering interactions.

Table S1. Percentage contribution of different phonon branches to  $\kappa$  for occurring  $\text{Mg}_3\text{Sb}_2$  at 300 K and 800 K, respectively.

| Material                 | $\kappa$ % | 300K-3-ph only |       | 300K-3+4ph |       | 800K-3ph only |       | 800K-3+4ph |       |
|--------------------------|------------|----------------|-------|------------|-------|---------------|-------|------------|-------|
|                          |            | xx             | zz    | xx         | zz    | xx            | zz    | xx         | zz    |
| $\text{Mg}_3\text{Sb}_2$ | TA1        | 28.54          | 15.59 | 27.54      | 16.35 | 28.25         | 15.52 | 25.97      | 16.38 |
|                          | TA2        | 25.88          | 38.96 | 26.87      | 36.07 | 25.65         | 38.76 | 26.97      | 36.44 |
|                          | LA         | 22.65          | 35.11 | 21.11      | 36.96 | 22.52         | 35.01 | 20.49      | 35.68 |
|                          | Optical    | 22.93          | 10.34 | 24.48      | 10.62 | 23.58         | 10.71 | 26.57      | 11.50 |
